# Supplementary material for: Replication Timing: A Fingerprint for Cell Identity and Pluripotency
Source: PLoS Comput Biol. 2011 Oct 20;7(10):e1002225. doi: 10.1371/journal.pcbi.1002225 (PMC3197641; doi:10.1371/journal.pcbi.1002225)
Supplement: Table S7 — Human and mouse HIST1 genes. Replication timing and transcription values across genes in the major HIST1 cluster in human and mouse. (XLSX) [file pcbi.1002225.s020.xlsx]

## Sheet: Mouse Hist1
Gene	Accession	Chr	Strand	txStart	txEnd	RT_46CESC_ave_Sm300	RT_D3ESC_ave_Sm300	RT_TT2ESC_ave_Sm300	RT_iPSC_ave_Sm300	RT_iPSC_1D4_Sm300	RT_iPSC_2D4_Sm300	RT_D3EPL_ave_Sm300	RT_D3EBM3_ave_Sm300	RT_EpiSC5cloneO_ave_Sm300	RT_EpiSC7_ave_Sm300	RT_D3EBM6_ave_Sm300	RT_46CNPC_ASd6_Sm300	RT_TT2NPC_ASd9_ave_Sm300	RT_D3NPC_EBM9_ave_Sm300	RT_Gsc.Sox17.Mesoderm_ave_Sm300	RT_Gsc.Sox17.Endoderm_ave_Sm300	RT_piPSC_1A2_Sm300	RT_piPSC_1B3_Sm300	RT_piPSC_V3_Sm300	RT_MEF_female_Sm300	RT_MEF_male_Sm300	RT_Myoblast_ave_Sm300	Tx_D3ESC_ave	Tx_EBM3_ave	Tx_EBM6_ave	Tx_EBM9_ave	Tx_EBM6R_ave	Tx_EpiSC7_ave	Tx_Gsc.Sox17.Mesoderm	Tx_Gsc.Sox17.Endoderm
Hist1h2bl	NM_178199	chr13	-	21723228	21723608	0.69	0.93	0.37	0.45	0.18	0.83	0.59	0.4	-0.38	-0.49	-0.33	-0.33	-0.55	-0.23	-0.22	-0.12	-0.6	-0.52	0.01	-0.7	-0.49	-0.87	2987	15018	17285	9814	16502	3631	19635	23499
Hist1h2ai	NM_178182	chr13	+	21723886	21724278	0.69	0.93	0.37	0.46	0.19	0.83	0.59	0.4	-0.38	-0.49	-0.33	-0.33	-0.55	-0.23	-0.22	-0.12	-0.6	-0.52	0.01	-0.7	-0.49	-0.87	24055	38842	36070	37958	45185	40435	38599	44264
Hist1h3h	NM_178206	chr13	+	21725092	21725579	0.7	0.93	0.38	0.47	0.2	0.84	0.6	0.41	-0.37	-0.49	-0.33	-0.33	-0.55	-0.23	-0.22	-0.12	-0.6	-0.52	0.01	-0.7	-0.49	-0.87	841	4911	4995	2446	2930	854	8936	9288
Hist1h2bm	NM_178200	chr13	+	21729562	21729942	0.73	0.94	0.41	0.52	0.23	0.85	0.63	0.44	-0.36	-0.47	-0.32	-0.32	-0.55	-0.23	-0.2	-0.11	-0.58	-0.52	0.01	-0.7	-0.48	-0.88	2546	14858	14987	9190	17550	3284	16983	22120
Hist1h4j	NM_178210	chr13	+	21742560	21742870	0.85	0.98	0.53	0.69	0.37	0.91	0.71	0.51	-0.31	-0.39	-0.27	-0.31	-0.54	-0.22	-0.17	-0.07	-0.52	-0.5	0	-0.71	-0.45	-0.91	1024	11058	10344	6461	9060	1645	11091	18272
Hist1h4k	NM_178211	chr13	-	21757659	21757970	0.99	1.01	0.68	0.91	0.53	0.96	0.8	0.59	-0.24	-0.29	-0.2	-0.29	-0.52	-0.21	-0.11	0	-0.43	-0.48	-0.01	-0.72	-0.4	-0.93	1067	9227	8539	4704	6500	1208	8163	11596
Hist1h2ak	NM_178183	chr13	-	21760900	21761292	1.01	1.01	0.71	0.95	0.56	0.97	0.82	0.61	-0.23	-0.26	-0.19	-0.28	-0.51	-0.21	-0.1	0.01	-0.41	-0.47	-0.01	-0.71	-0.39	-0.93	11962	20963	21217	18878	24739	21831	26671	27127
Hist1h1b	NM_020034	chr13	-	21787347	21788019	1.17	1.02	0.93	1.23	0.73	1	0.94	0.74	-0.11	-0.08	-0.11	-0.22	-0.48	-0.14	-0.06	0.14	-0.31	-0.4	0.02	-0.65	-0.32	-0.94	358	4315	4435	2260	5431	613	6017	6101
Hist1h3i	NM_178207	chr13	-	21790379	21790862	1.19	1.02	0.96	1.26	0.75	1	0.96	0.76	-0.09	-0.06	-0.1	-0.21	-0.48	-0.13	-0.06	0.15	-0.3	-0.39	0.02	-0.64	-0.31	-0.94	421	3853	4657	2176	2553	634	6248	7985
Hist1h2bp	NM_178202	chr13	+	21794979	21795359	1.21	1.02	1	1.3	0.77	1.01	0.98	0.78	-0.07	-0.02	-0.09	-0.19	-0.47	-0.11	-0.05	0.18	-0.29	-0.38	0.03	-0.62	-0.3	-0.94	2336	14959	17703	9538	15829	3746	18333	24521
Hist1h2ah	NM_175659	chr13	-	22042631	22043017	1.88	1.47	1.58	1.65	1.48	1.37	1.38	1.54	0.19	1.16	0.44	0.24	0.16	0.59	0.34	0.55	0.08	-0.02	0.75	-0.33	0.04	-1.08	24484	38964	38222	35414	45876	43997	45921	49207
Hist1h2bk	NM_175665	chr13	+	22043351	22043730	1.88	1.46	1.58	1.65	1.46	1.36	1.38	1.53	0.19	1.16	0.43	0.23	0.15	0.59	0.33	0.54	0.07	-0.03	0.74	-0.34	0.03	-1.09	3159	16499	17784	10129	16954	4327	16850	25383
Hist1h4i	NM_175656	chr13	-	22048280	22048817	1.88	1.46	1.55	1.62	1.39	1.33	1.4	1.47	0.18	1.11	0.35	0.16	0.09	0.53	0.26	0.49	0.02	-0.09	0.67	-0.41	-0.03	-1.13	469	3760	3105	1837	3257	392	1945	2673
Hist1h4h	BC087952	chr13	+	23538514	23538984	1.63	1.27	1.3	1.48	1.26	1.22	1.11	1.56	0.69	1.09	0.77	0.69	0.39	0.71	1.15	1.55	0.2	0.16	0.59	-0.1	0.04	-0.62	1615	9273	9698	5613	8161	1747	8028	10409
Hist1h3g	NM_145073	chr13	+	23542882	23543373	1.62	1.28	1.28	1.43	1.22	1.16	1.1	1.5	0.64	1.03	0.7	0.62	0.32	0.65	1.1	1.52	0.12	0.09	0.52	-0.17	-0.01	-0.66	1403	6648	10286	3959	4944	1418	12023	14199
Hist1h2bh	NM_178197	chr13	-	23550437	23550817	1.6	1.32	1.23	1.34	1.16	1.04	1.1	1.38	0.54	0.9	0.57	0.47	0.19	0.55	1	1.45	-0.04	-0.07	0.37	-0.31	-0.12	-0.74	3045	14179	16154	9059	16288	3702	19339	25146
Hist1h4f	NM_175655	chr13	-	23558798	23559108	1.59	1.37	1.18	1.24	1.08	0.91	1.09	1.23	0.43	0.74	0.4	0.28	0.04	0.42	0.87	1.36	-0.25	-0.26	0.19	-0.47	-0.25	-0.84	1339	10008	10683	5682	9022	1676	10218	13512
Hist1h1d	NM_145713	chr13	+	23562498	23565473	1.59	1.39	1.16	1.2	1.05	0.85	1.09	1.16	0.38	0.67	0.33	0.2	-0.03	0.36	0.82	1.32	-0.34	-0.34	0.11	-0.55	-0.3	-0.89	190	144	254	199	191	179	64	118
Hist1h3e	NM_178205	chr13	-	23569421	23569830	1.58	1.42	1.11	1.13	0.99	0.76	1.09	1.05	0.28	0.54	0.21	0.06	-0.15	0.26	0.72	1.26	-0.49	-0.48	-0.02	-0.67	-0.39	-0.96	2262	13601	16739	7890	9309	2545	19721	23976
Hist1h2bg	NM_178196	chr13	+	23578860	23579478	1.58	1.44	1.05	1.05	0.9	0.68	1.1	0.93	0.16	0.37	0.09	-0.11	-0.28	0.15	0.62	1.17	-0.64	-0.62	-0.17	-0.79	-0.48	-1.05	398	539	1579	426	548	294	335	907
Hist1h2bf	NM_178195	chr13	-	23581275	23581655	1.6	1.45	1.03	1.04	0.87	0.66	1.12	0.9	0.13	0.31	0.06	-0.16	-0.32	0.13	0.59	1.15	-0.68	-0.65	-0.21	-0.81	-0.5	-1.07	2758	16518	17614	9575	17233	4073	20482	25178
Hist1h2ad	NM_178188	chr13	+	23581935	23582326	1.6	1.46	1.03	1.03	0.87	0.66	1.12	0.89	0.12	0.3	0.05	-0.18	-0.33	0.12	0.59	1.14	-0.69	-0.66	-0.22	-0.82	-0.51	-1.08	23980	39563	37898	35986	46743	44501	45496	54932
Hist1h3d	NM_178204	chr13	+	23583266	23583675	1.61	1.46	1.02	1.03	0.85	0.65	1.13	0.87	0.1	0.27	0.03	-0.21	-0.35	0.1	0.57	1.13	-0.72	-0.69	-0.25	-0.84	-0.52	-1.1	2839	12330	15620	7696	9852	2793	16402	19819
Hist1h4d	NM_175654	chr13	+	23589066	23589376	1.67	1.5	0.98	1	0.8	0.63	1.18	0.8	0	0.12	-0.05	-0.36	-0.44	0.03	0.52	1.07	-0.82	-0.78	-0.35	-0.91	-0.58	-1.18	807	8837	9259	5387	7923	1403	9720	16028
Hist1h2be	BC069889	chr13	-	23591207	23628589	1.68	1.51	0.97	0.99	0.78	0.62	1.2	0.77	-0.03	0.07	-0.07	-0.41	-0.47	0	0.5	1.05	-0.86	-0.81	-0.39	-0.93	-0.6	-1.2	478	621	780	466	342	219	212	194
Hist1h1t	NM_010377	chr13	+	23703275	23704186	0.36	0.57	-0.09	0.25	-0.6	0.13	0.56	-0.08	-0.82	-1.05	-0.66	-0.73	-1.15	-0.52	-0.44	0.09	-0.94	-1.21	-1	-1.07	-0.65	-0.92	158	255	195	192	120	126	244	188
Hist1h4c	NM_178208	chr13	-	23705604	23705914	0.33	0.55	-0.1	0.23	-0.63	0.1	0.55	-0.1	-0.82	-1.05	-0.67	-0.72	-1.14	-0.52	-0.45	0.07	-0.93	-1.21	-1	-1.06	-0.65	-0.91	3261	16878	17564	11105	16672	3785	17045	22448
Hist1h1c	NM_015786	chr13	+	23746271	23747831	-0.11	0.18	-0.24	-0.07	-0.96	-0.43	0.62	-0.32	-0.6	-0.93	-0.83	-0.54	-0.95	-0.41	-0.57	-0.15	-0.93	-1.18	-0.98	-0.85	-0.72	-0.68	6065	4126	8482	5486	4792	4716	6956	9718
Hist1h3c	NM_175653	chr13	-	23752507	23752986	-0.15	0.14	-0.26	-0.1	-1	-0.49	0.64	-0.34	-0.57	-0.9	-0.81	-0.52	-0.93	-0.36	-0.59	-0.17	-0.94	-1.17	-0.98	-0.82	-0.71	-0.64	660	3720	4126	2016	2306	773	5388	6190
Hist1h2bb	NM_175664	chr13	+	23754198	23754666	-0.16	0.13	-0.26	-0.11	-1	-0.51	0.65	-0.34	-0.56	-0.89	-0.8	-0.51	-0.92	-0.34	-0.59	-0.18	-0.94	-1.16	-0.98	-0.81	-0.7	-0.63	448	1811	2212	1128	1422	343	3009	3358
Hist1h3b	NM_178203	chr13	+	23759844	23760253	-0.17	0.1	-0.27	-0.13	-1.03	-0.56	0.69	-0.35	-0.52	-0.86	-0.76	-0.5	-0.89	-0.28	-0.6	-0.19	-0.95	-1.14	-0.98	-0.77	-0.7	-0.6	3132	15310	20222	10000	13813	3899	22402	25552
Hist1h4b	NM_178193	chr13	+	23764485	23764795	-0.18	0.09	-0.28	-0.15	-1.04	-0.6	0.73	-0.35	-0.48	-0.83	-0.72	-0.5	-0.86	-0.23	-0.61	-0.19	-0.95	-1.11	-0.98	-0.74	-0.69	-0.58	761	5672	5961	3243	4047	805	4448	5408
Hist1h4a	NM_178192	chr13	-	23768312	23768622	-0.18	0.08	-0.28	-0.16	-1.06	-0.63	0.76	-0.35	-0.45	-0.81	-0.69	-0.49	-0.84	-0.18	-0.62	-0.2	-0.96	-1.1	-0.97	-0.71	-0.68	-0.56	1048	8962	8543	5707	8253	1341	8535	11772
Hist1h1a	NM_030609	chr13	+	23771132	23771878	-0.19	0.07	-0.28	-0.17	-1.07	-0.66	0.77	-0.35	-0.43	-0.79	-0.66	-0.49	-0.82	-0.15	-0.63	-0.2	-0.97	-1.09	-0.97	-0.69	-0.67	-0.55	191	1267	1450	565	590	279	3832	4038
Hist1h2ba	NM_175663	chr13	-	23941238	23941621	-0.5	0.11	-0.19	-0.43	-1.42	-0.64	0.83	0.31	0.21	0.16	0.12	-0.12	-0.26	0.57	-1.11	-0.19	-1.22	-1.21	-0.89	0.13	0.15	-0.37	101	159	111	73	81	61	67	58
Hist1h2aa	NM_175658	chr13	+	23941926	23942315	-0.5	0.12	-0.19	-0.43	-1.42	-0.64	0.84	0.31	0.21	0.17	0.12	-0.12	-0.26	0.57	-1.1	-0.19	-1.22	-1.21	-0.88	0.13	0.15	-0.37	62	157	86	74	57	71	78	87

## Sheet: Human HIST1
Gene	ID	CHR	Strand	txStart	txEnd	RT_BG01ES.R1	RT_BG02ES.R2	RT_BG02ES.R1	RT_H1ES.R1	RT_H1ES.R2	RT_H1ES.R3	RT_H7ES.R1	RT_H7ES.R2	RT_H7ES.R3	RT_H7ES.R4	RT_H7ES.R5	RT_H7ES.R6	RT_H9ES.R1	RT_iPS4.R1	RT_iPS4.R2	RT_iPS5.R1	RT_iPS5.R2	RT_BG01NP.R1	RT_BG01NP.R2	RT_C0202Lymph.R1	RT_C0202Lymph.R2	RT_GM06990Lymph.R1	RT_GM06990Lymph.R2	RT_DE2.R1	RT_DE2.R2	RT_DE4.R1	RT_DE4.R2	RT_ISL1.R1	RT_ISL1.R2	RT_SmoM.R1	RT_SmoM.R2	Tx_H7ES.ave	Tx_BG01ES.ave	Tx_BG02ES.ave	Tx_BG01NP.ave
HIST1H2AA	NM_170745	chr6	-	25834269	25834769	-0.5	-0.2	-0.7	-0.7	-0.6	-1	-0.7	-1	0.2	-0.3	-0.3	-0.6	-0.5	-0.8	-0.8	-0.5	-1.4	-0.7	-0.8	-0.1	0.1	-0.3	-0.4	-1	-0.7	-0.6	-0.4	-0.6	-0.9	-1	-0.7	98.6	141.6	169.8	130.7
HIST1H2BA	NM_170610	chr6	+	25835115	25835552	-0.5	-0.3	-0.7	-0.7	-0.7	-1	-0.7	-1	0.2	-0.3	-0.4	-0.6	-0.5	-0.8	-0.8	-0.5	-1.4	-0.7	-0.8	-0.1	0.1	-0.3	-0.4	-1	-0.7	-0.5	-0.4	-0.6	-0.9	-1	-0.6	27.6	26.6	25.6	26.8
HIST1H1A	NM_005325	chr6	-	26125238	26126019	-0.6	-0.5	-1	-1.1	-0.9	-1	-0.7	-1.1	-0.8	-1.4	-1.3	-1.1	-0.7	-0.9	-0.7	-1	-1.4	-1.1	-1	-0.1	-0.1	-0.2	-0.3	-0.6	-0.9	-0.7	-1.2	-0.8	-0.8	-0.7	-1	1488.6	1404.7	2782.1	2151.7
HIST1H3A	NM_003529	chr6	+	26128696	26129165	-0.6	-0.5	-1	-1.1	-0.9	-1	-0.7	-1.1	-0.8	-1.4	-1.4	-1	-0.8	-0.9	-0.7	-1	-1.4	-1.1	-1	-0.1	-0.2	-0.2	-0.3	-0.7	-0.8	-0.7	-1.2	-0.7	-0.8	-0.8	-1.1	694.9	291.7	317.2	731.8
HIST1H4A	NM_003538	chr6	+	26129885	26130257	-0.6	-0.5	-1	-1.1	-0.9	-1	-0.7	-1.1	-0.8	-1.3	-1.4	-1	-0.8	-0.9	-0.7	-1	-1.4	-1.1	-1	-0.1	-0.2	-0.2	-0.3	-0.7	-0.8	-0.7	-1.2	-0.7	-0.8	-0.8	-1.1	966.3	600.2	584.4	305.7
HIST1H4B	NM_003544	chr6	-	26135102	26135459	-0.6	-0.5	-1.1	-1.1	-0.9	-1	-0.7	-1.2	-0.8	-1.2	-1.4	-0.8	-0.8	-1	-0.7	-1	-1.4	-1.1	-1	-0.1	-0.2	-0.2	-0.2	-0.7	-0.7	-0.8	-1.3	-0.6	-0.7	-1.1	-1.1	966.3	600.2	584.4	305.7
HIST1H3B	NM_003537	chr6	-	26139795	26140267	-0.7	-0.6	-1.1	-1.1	-0.9	-1	-0.8	-1.2	-0.7	-1.1	-1.3	-0.7	-0.8	-1	-0.7	-1	-1.5	-1.1	-1.1	-0.2	-0.2	-0.2	-0.2	-0.8	-0.6	-0.8	-1.3	-0.6	-0.6	-1.3	-1.2	694.9	291.7	317.2	731.8
HIST1H2AB	NM_003513	chr6	-	26141298	26141775	-0.7	-0.6	-1.1	-1.1	-0.9	-1	-0.8	-1.2	-0.7	-1	-1.3	-0.7	-0.8	-1	-0.7	-1	-1.5	-1	-1.1	-0.2	-0.2	-0.2	-0.2	-0.9	-0.6	-0.9	-1.3	-0.5	-0.6	-1.3	-1.2	622.1	338.5	324.7	509.1
HIST1H2BB	NM_021062	chr6	-	26151433	26151864	-0.7	-0.6	-1.1	-1.1	-1	-1	-0.8	-1.2	-0.7	-0.9	-1.1	-0.7	-0.8	-1	-0.7	-1	-1.5	-1	-1.1	-0.2	-0.2	-0.1	-0.1	-1	-0.5	-0.9	-1.3	-0.5	-0.5	-1.4	-1.2	1622.6	965.8	885.2	2167.2
HIST1H3C	NM_003531	chr6	+	26153617	26154076	-0.7	-0.6	-1.1	-1.1	-1	-1	-0.8	-1.3	-0.7	-1	-1	-0.7	-0.8	-1	-0.7	-1.1	-1.5	-1	-1.1	-0.2	-0.2	-0.1	-0.1	-1	-0.5	-0.9	-1.3	-0.5	-0.4	-1.4	-1.2	694.9	291.7	317.2	731.8
HIST1H1C	NM_005319	chr6	-	26163946	26164678	-0.7	-0.7	-1.1	-1.2	-1	-1	-0.8	-1.3	-0.9	-1.4	-0.9	-0.9	-0.9	-1	-0.7	-1.1	-1.5	-1.1	-1.1	-0.1	-0.2	0	-0.2	-0.9	-0.6	-1	-1	-0.8	-0.4	-1.1	-1	9226.2	4792	2796.3	8243.5
HIST1H4C	NM_003542	chr6	+	26212154	26212544	-0.8	-0.8	-1	-1.1	-0.8	-0.9	-0.9	-1.3	-1.1	-1.3	-1.4	-0.8	-1	-0.8	-0.6	-1	-1.4	-1.1	-1.1	0	-0.1	0.1	0	-1.1	-1.2	-0.7	-1.2	-0.9	-1.1	-1.2	-1.3	966.3	600.2	584.4	305.7
HIST1H1T	NM_005323	chr6	-	26215618	26216343	-0.8	-0.8	-1	-1.1	-0.8	-0.9	-0.9	-1.3	-1.1	-1.2	-1.3	-0.8	-1	-0.8	-0.6	-1	-1.3	-1.1	-1.1	0	-0.1	0	0	-1.1	-1.2	-0.8	-1.2	-0.9	-1.1	-1.2	-1.2	182	67.2	89.5	82.6
HIST1H2BC	NM_003526	chr6	-	26231673	26232111	-0.8	-0.7	-1	-1.1	-0.8	-0.8	-0.9	-1.3	-1.1	-1	-1.2	-0.6	-1	-0.7	-0.5	-1	-1.3	-1.1	-1.1	0.1	-0.1	-0.1	0	-0.9	-1	-1.2	-1.2	-1.1	-1	-1.2	-1	4596.9	3693.4	2323	6480.9
HIST1H2AC	NM_003512	chr6	+	26232351	26232897	-0.8	-0.7	-1	-1.1	-0.8	-0.8	-0.9	-1.3	-1.1	-1	-1.2	-0.6	-1	-0.7	-0.5	-1	-1.3	-1.1	-1.1	0.1	-0.1	-0.1	0	-0.8	-1	-1.2	-1.2	-1.1	-1	-1.2	-1	1627.7	2278.3	1056.8	1346.3
HIST1H1E	NM_005321	chr6	+	26264537	26265322	-0.7	-0.7	-1	-1	-0.8	-0.8	-0.9	-1.2	-1.1	-1.1	-1.1	-0.7	-1	-0.6	-0.4	-0.8	-1.2	-1.1	-1	0.2	0	0.4	0.3	-0.7	-0.2	-1	-0.9	-0.9	-0.9	-1.1	-1.1	3084.5	1593.3	1071.6	2166.7
HIST1H2BD	NM_021063	chr6	+	26266327	26266850	-0.7	-0.7	-1	-1	-0.9	-0.8	-0.9	-1.2	-1.1	-1.2	-1.1	-0.7	-1	-0.6	-0.4	-0.8	-1.2	-1.1	-1	0.3	0	0.4	0.3	-0.8	-0.1	-1	-0.9	-0.9	-0.8	-1.1	-1.1
HIST1H2BE	NM_003523	chr6	+	26292002	26292437	-0.6	-0.6	-1	-1	-0.9	-0.8	-0.7	-1.2	-0.6	-1.2	-0.9	-0.5	-0.9	-0.5	-0.3	-0.7	-1.2	-1.2	-1.1	0.4	0.1	0.5	0.5	-0.6	-0.5	-0.6	-1.2	-1	-1	-1.4	-0.7	4596.9	3693.4	2323	6480.9
HIST1H4D	NM_003539	chr6	-	26296916	26297283	-0.6	-0.6	-1	-1	-0.9	-0.8	-0.7	-1.2	-0.6	-1.2	-0.9	-0.5	-0.9	-0.5	-0.3	-0.7	-1.2	-1.1	-1.1	0.5	0.1	0.5	0.5	-0.5	-0.5	-0.6	-1.2	-1	-1.1	-1.3	-0.7	966.3	600.2	584.4	305.7
HIST1H3D	NM_003530	chr6	-	26304990	26307443	-0.5	-0.5	-0.9	-1	-0.9	-0.8	-0.7	-1.2	-1	-1.4	-0.8	-0.6	-0.9	-0.4	-0.2	-0.6	-1.2	-1.1	-1.1	0.5	0.2	0.5	0.6	-0.3	-0.5	-0.6	-1.2	-1.2	-1.3	-1.1	-0.8	694.9	291.7	317.2	731.8
HIST1H2BF	NM_003522	chr6	+	26307765	26308195	-0.5	-0.5	-0.9	-1	-0.9	-0.8	-0.6	-1.2	-1.1	-1.5	-0.8	-0.7	-0.9	-0.4	-0.2	-0.6	-1.2	-1.1	-1.1	0.5	0.2	0.5	0.6	-0.3	-0.4	-0.6	-1.2	-1.2	-1.4	-1	-0.9	4596.9	3693.4	2323	6480.9
HIST1H4E	NM_003545	chr6	+	26312851	26313228	-0.5	-0.5	-0.9	-1	-0.9	-0.8	-0.6	-1.2	-1.3	-1.5	-0.7	-0.7	-0.8	-0.4	-0.2	-0.6	-1.2	-1.1	-1.1	0.6	0.2	0.6	0.7	-0.2	-0.4	-0.5	-1.1	-1.2	-1.5	-0.9	-1	966.3	600.2	584.4	305.7
HIST1H2BG	NM_003518	chr6	-	26324407	26324851	-0.4	-0.4	-0.9	-1	-0.9	-0.8	-0.5	-1.2	-1	-1.2	-0.4	-0.5	-0.7	-0.3	-0.1	-0.5	-1.1	-1.1	-1.1	0.6	0.3	0.6	0.8	-0.3	-0.4	-0.4	-1	-1.1	-1.2	-0.8	-1.1	4596.9	3693.4	2323	6480.9
HIST1H2AE	NM_021052	chr6	+	26325126	26325690	-0.4	-0.4	-0.9	-1	-0.9	-0.8	-0.5	-1.2	-1	-1.2	-0.4	-0.5	-0.7	-0.3	-0.1	-0.5	-1.1	-1.1	-1.1	0.6	0.3	0.6	0.8	-0.3	-0.4	-0.4	-1	-1.1	-1.2	-0.8	-1.1	622.1	338.5	324.7	509.1
HIST1H3E	NM_003532	chr6	+	26333361	26333823	-0.4	-0.4	-0.8	-0.9	-0.9	-0.7	-0.4	-1.1	-0.7	-0.7	-0.2	-0.3	-0.6	-0.3	-0.1	-0.4	-1.1	-1.1	-1.1	0.7	0.3	0.7	0.9	-0.4	-0.5	-0.6	-1	-1	-0.9	-0.9	-1	694.9	291.7	317.2	731.8
HIST1H1D	NM_005320	chr6	-	26342418	26343195	-0.3	-0.3	-0.8	-0.9	-0.9	-0.7	-0.3	-1.1	-0.9	-0.5	0	-0.3	-0.6	-0.2	0	-0.3	-1	-1.1	-1.1	0.7	0.4	0.9	0.9	-0.3	-0.6	-0.9	-1	-0.9	-0.7	-1.1	-1.1	1950.5	1005.9	662.9	1104.3
HIST1H4F	NM_003540	chr6	+	26348632	26349000	-0.3	-0.3	-0.7	-0.9	-0.8	-0.7	-0.2	-1.1	-1.2	-0.7	0	-0.6	-0.5	-0.2	0	-0.3	-1	-1.1	-1.1	0.8	0.4	0.9	0.9	-0.2	-0.7	-1	-1.1	-1	-0.6	-1.2	-1.2	966.3	600.2	584.4	305.7
HIST1H4G	NM_003547	chr6	-	26354817	26355184	-0.3	-0.2	-0.7	-0.8	-0.8	-0.6	-0.1	-1	-1.3	-0.9	0	-0.8	-0.4	-0.1	0	-0.2	-0.9	-1.1	-1.1	0.8	0.4	1	0.8	-0.1	-0.7	-0.9	-1	-0.9	-0.5	-1.3	-1.2	33.9	31.5	31.4	32.5
HIST1H3F	NM_021018	chr6	-	26358348	26358814	-0.2	-0.2	-0.6	-0.8	-0.8	-0.6	-0.1	-1	-1.4	-1.1	0	-0.8	-0.4	-0.1	0	-0.2	-0.9	-1.1	-1	0.9	0.5	1	0.8	-0.1	-0.7	-0.8	-0.9	-0.9	-0.5	-1.4	-1.2	694.9	291.7	317.2	731.8
HIST1H2BH	NM_003524	chr6	+	26359857	26360282	-0.2	-0.1	-0.6	-0.8	-0.8	-0.6	-0.1	-1	-1.4	-1.1	0.1	-0.8	-0.3	-0.1	0.1	-0.2	-0.9	-1.1	-1	0.9	0.5	1	0.8	-0.1	-0.7	-0.8	-0.9	-0.9	-0.5	-1.4	-1.2	10905.2	6710.9	5219.2	14579.6
HIST1H3G	NM_003534	chr6	-	26379124	26379591	-0.1	0.1	-0.4	-0.6	-0.6	-0.5	0.2	-0.8	-0.7	-0.9	0.3	-0.5	-0.1	0.2	0.2	0	-0.6	-1	-1	1	0.6	1.2	1	0	-0.2	-0.2	-0.4	-0.8	-0.5	-1.1	-1.1	694.9	291.7	317.2	731.8
HIST1H2BI	NM_003525	chr6	+	26381182	26381619	0	0.1	-0.3	-0.6	-0.6	-0.5	0.2	-0.8	-0.6	-0.9	0.3	-0.4	0	0.2	0.2	0.1	-0.6	-1	-1	1	0.6	1.2	1.1	0.1	-0.1	-0.2	-0.4	-0.8	-0.5	-1	-1	4596.9	3693.4	2323	6480.9
HIST1H4H	NM_003543	chr6	-	26393332	26393706	0.1	0.3	-0.2	-0.5	-0.5	-0.4	0.4	-0.7	-0.5	-0.8	0.5	-0.1	0.1	0.3	0.3	0.2	-0.4	-1	-1	1.1	0.7	1.1	1.1	0.2	0.2	-0.3	-0.4	-0.8	-0.6	-1	-0.7	966.3	600.2	584.4	305.7
HIST1H2BJ	NM_021058	chr6	-	27208073	27208554	0.1	0	-0.4	-0.6	-0.5	-0.3	-0.1	-1	-1.1	-0.8	0.2	-0.1	-0.1	0	0.6	-0.3	-0.6	-1.1	-0.9	-0.1	-0.3	-0.3	-0.3	-0.5	0.1	-0.5	-0.8	-0.8	-1	-1.7	-0.9	141.8	111.9	82.4	145.9
HIST1H2AG	NM_021064	chr6	+	27208799	27211050	0.1	0	-0.4	-0.6	-0.5	-0.3	0	-1	-1.1	-0.8	0.2	-0.1	-0.1	0	0.6	-0.3	-0.6	-1.1	-0.9	-0.1	-0.3	-0.3	-0.3	-0.5	0.2	-0.5	-0.8	-0.8	-1	-1.7	-0.9	11918.3	5976.4	10634.2	10392.2
HIST1H2BK	NM_080593	chr6	-	27214051	27222598	0.1	0	-0.3	-0.5	-0.5	-0.2	0	-1	-1.2	-0.8	0.4	0.1	-0.1	0	0.6	-0.3	-0.6	-1.1	-0.9	-0.1	-0.3	-0.3	-0.3	-0.4	0.3	-0.6	-0.7	-0.8	-1	-1.7	-0.9	4630.8	1495.5	831.8	2616.1
HIST1H4I	NM_003495	chr6	+	27215066	27215436	0.1	0	-0.3	-0.5	-0.5	-0.2	0	-1	-1.2	-0.8	0.4	0.1	-0.1	0	0.6	-0.3	-0.6	-1.1	-0.9	-0.1	-0.3	-0.2	-0.3	-0.3	0.3	-0.6	-0.7	-0.8	-1	-1.7	-1	966.3	600.2	584.4	305.7
HIST1H2AH	NM_080596	chr6	+	27222886	27223325	0.1	0.1	-0.3	-0.5	-0.4	-0.2	0	-1	-1.3	-0.8	0.5	0.3	0	0.1	0.6	-0.3	-0.5	-1.1	-0.9	-0.1	-0.3	-0.2	-0.2	-0.2	0.3	-0.7	-0.6	-0.8	-1.1	-1.6	-1.1	11918.3	5976.4	10634.2	10392.2
HIST1H2BL	NM_003519	chr6	-	27883235	27883688	-0.1	0	-0.5	-0.6	-0.6	-0.6	-0.3	-1.2	-0.8	-0.9	-0.3	-0.1	-0.4	-0.5	0.1	-0.8	-1	-1	-1.1	0	-0.3	-0.1	0	-0.6	-0.8	-0.6	-0.9	-1.2	-1.2	-1.2	-1.3	7931.8	4697.2	3378.7	9565.6
HIST1H2AI	NM_003509	chr6	+	27883955	27884424	-0.1	0	-0.5	-0.6	-0.6	-0.6	-0.3	-1.2	-0.8	-0.8	-0.3	-0.1	-0.4	-0.5	0.1	-0.8	-1	-1	-1.1	0	-0.4	-0.2	0	-0.6	-0.8	-0.6	-0.9	-1.2	-1.2	-1.2	-1.3
HIST1H3H	NM_003536	chr6	+	27885820	27886293	-0.1	0	-0.5	-0.6	-0.6	-0.6	-0.3	-1.2	-0.9	-0.8	-0.4	-0.1	-0.4	-0.5	0	-0.8	-1	-1	-1.1	0	-0.4	-0.2	0	-0.6	-0.8	-0.7	-0.9	-1.2	-1.1	-1.1	-1.3	11918.3	5976.4	10634.2	10392.2
HIST1H2AJ	NM_021066	chr6	-	27890058	27890497	-0.1	-0.1	-0.5	-0.6	-0.6	-0.7	-0.3	-1.2	-1.1	-0.8	-0.4	-0.1	-0.5	-0.5	0	-0.8	-1.1	-1	-1.1	0	-0.4	-0.2	0	-0.6	-0.8	-0.7	-1	-1.2	-1.1	-1.1	-1.4	7521.3	3925.4	4752.3	8355.3
HIST1H2BM	NM_003521	chr6	+	27890800	27891246	-0.1	-0.1	-0.5	-0.7	-0.6	-0.7	-0.3	-1.2	-1.1	-0.8	-0.4	-0.1	-0.5	-0.5	0	-0.8	-1.1	-1	-1.1	0	-0.4	-0.2	0	-0.6	-0.8	-0.7	-1	-1.2	-1.1	-1.1	-1.4	4859.7	3255.3	2283.6	5109.4
HIST1H4J	NM_021968	chr6	+	27899881	27900237	-0.2	-0.2	-0.6	-0.7	-0.6	-0.7	-0.4	-1.2	-1.2	-1	-0.4	-0.5	-0.6	-0.6	0	-0.9	-1.1	-1	-1.1	-0.1	-0.4	-0.2	-0.2	-0.7	-0.7	-0.6	-0.9	-1.1	-0.9	-1.1	-1.4	966.3	600.2	584.4	305.7
HIST1H4K	NM_003541	chr6	-	27906930	27907284	-0.3	-0.3	-0.7	-0.7	-0.6	-0.7	-0.5	-1.2	-1.2	-1.1	-0.3	-0.6	-0.6	-0.7	-0.1	-0.9	-1.1	-1	-1.1	-0.1	-0.5	-0.2	-0.3	-0.7	-0.7	-0.6	-0.9	-1.1	-0.8	-1.1	-1.4	966.3	600.2	584.4	305.7
HIST1H2AK	NM_003510	chr6	-	27913636	27914096	-0.3	-0.3	-0.7	-0.8	-0.6	-0.8	-0.5	-1.2	-0.9	-1	-0.2	-0.6	-0.7	-0.7	-0.1	-0.9	-1.1	-1	-1.1	-0.2	-0.5	-0.2	-0.3	-0.7	-0.9	-0.4	-0.9	-1.2	-0.9	-1.4	-1.3	11918.3	5976.4	10634.2	10392.2
HIST1H2BN	NM_003520	chr6	+	27914418	27914867	-0.3	-0.3	-0.7	-0.8	-0.6	-0.8	-0.5	-1.2	-0.9	-1	-0.2	-0.6	-0.7	-0.7	-0.1	-0.9	-1.1	-0.9	-1.1	-0.2	-0.5	-0.2	-0.3	-0.7	-0.9	-0.4	-0.9	-1.2	-0.9	-1.4	-1.3	7204.9	4723.6	3742.2	9785.3
HIST1H2AL	NM_003511	chr6	+	27941085	27941555	-0.5	-0.5	-0.8	-0.9	-0.6	-0.8	-0.7	-1.1	-0.8	-0.7	-0.4	-0.9	-0.9	-0.9	-0.3	-1.1	-1.2	-0.9	-1	-0.3	-0.6	-0.3	-0.2	-0.8	-1	-0.9	-1.3	-1.2	-1.1	-1.3	-1.4	11918.3	5976.4	10634.2	10392.2
HIST1H1B	NM_005322	chr6	-	27942548	27943338	-0.5	-0.6	-0.9	-0.9	-0.6	-0.8	-0.7	-1.1	-0.8	-0.7	-0.4	-0.9	-0.9	-0.9	-0.3	-1.1	-1.2	-0.9	-1	-0.3	-0.6	-0.3	-0.2	-0.8	-0.9	-1	-1.3	-1.1	-1.1	-1.3	-1.4	2849.1	1729.3	1092.8	3609
HIST1H3I	NM_003533	chr6	-	27947601	27948078	-0.5	-0.6	-0.9	-0.9	-0.6	-0.9	-0.8	-1.1	-0.8	-0.7	-0.5	-0.9	-1	-0.9	-0.3	-1.1	-1.3	-0.9	-1	-0.4	-0.6	-0.3	-0.1	-0.8	-0.9	-1.1	-1.3	-1.1	-1.1	-1.2	-1.4	694.9	291.7	317.2	731.8
HIST1H4L	NM_003546	chr6	-	27948904	27949268	-0.5	-0.6	-0.9	-0.9	-0.6	-0.9	-0.8	-1.1	-0.8	-0.7	-0.6	-0.9	-1	-0.9	-0.3	-1.1	-1.3	-0.9	-1	-0.4	-0.6	-0.3	-0.1	-0.8	-0.9	-1.1	-1.3	-1.1	-1	-1.2	-1.3	966.3	600.2	584.4	305.7
HIST1H3J	NM_003535	chr6	-	27966071	27966549	-0.6	-0.7	-0.9	-0.9	-0.7	-0.9	-0.9	-1.1	-0.8	-1	-1.1	-0.5	-1.1	-1	-0.3	-1.2	-1.3	-0.9	-1	-0.4	-0.6	-0.3	-0.1	-1	-0.7	-1.1	-0.9	-1	-0.6	-1.1	-1.1	694.9	291.7	317.2	731.8
HIST1H2AM	NM_003514	chr6	-	27968455	27968942	-0.6	-0.7	-0.9	-0.9	-0.7	-0.9	-0.9	-1.1	-0.8	-1	-1.1	-0.5	-1.1	-1	-0.4	-1.2	-1.3	-0.9	-1	-0.4	-0.6	-0.3	-0.1	-1	-0.7	-1.1	-0.9	-1	-0.6	-1.1	-1	11918.3	5976.4	10634.2	10392.2
HIST1H2BO	NM_003527	chr6	+	27969181	27969648	-0.6	-0.7	-0.9	-0.9	-0.7	-0.9	-0.9	-1.1	-0.8	-1	-1.1	-0.5	-1.1	-1	-0.4	-1.2	-1.3	-0.9	-1	-0.4	-0.6	-0.3	-0.2	-1	-0.7	-1.1	-0.9	-1	-0.6	-1.1	-1	5027.7	4097.4	3128.5	8114.9
